# Supplementary material
Source: PubMed Central journal article supplement (PMC5990252)
Supplement: NIHMS969133-supplement-Appendix.pdf [file NIHMS969133-supplement-Appendix.pdf]

## Appendix 1

### *Pregnancy Identification Algorithm*

We used the following procedure to identify unique pregnancies in Oregon Medicaid, Emergency Medicaid and Emergency Medicaid Plus claims data from January 1, 2003 through October 1, 2015.

1. Limit sample to women ages 12-51 at the time of the claim
2. Identify pregnancy-related claims using *International Classification of Diseases, Ninth Revision ±ICD-9* and *Current Procedural Terminology ±CPT*
3. Score claims using ICD-9 diagnosis, *Current Procedure Terminology ±CPT* and ICD-9 procedure codes that could occur only at the end of a pregnancy episode and indicate the outcome type ±e.g. spontaneous abortion versus live birth. We refer to these as “outcome codes”. Use the following hierarchy for dating each potential day that marks the end of a pregnancy episode:
  - a. a day is coded with a score of “10” if there are any claims with an ICD-9 procedure outcome code on that day
  - b. a day is coded with a score of “10” if there are claims with outcome codes from at least two different categories ±ICD-9 diagnosis, CPT or ICD-9 procedures on that day
  - c. a day is coded with a score of “5” if there are only claims with outcome codes from either the ICD-9 diagnosis or the CPT category, but there are four or more such claims on that day
  - d. a day is coded with a score of “1” if there are only claims with outcome codes from either the ICD-9 diagnosis or the CPT category, and there are three or fewer such claims on that day
  - e. Hierarchically favoring higher scores, establish dates for end of pregnancy episodes with a score of 10, then a score of 5, then a score of 1.
  - f. Use the identified dates generated with ±e to group claims by pregnancy episode.
    - i. Estimate gestational age using a previously published algorithm based on national median gestational age by outcome type:<sup>1</sup>
      1. Ectopic pregnancy = 8 weeks
      2. Spontaneous abortion = 10 weeks
      3. Therapeutic abortion = 10 weeks
      4. Preterm birth = 34 weeks
      5. Stillbirth = 28 weeks
      6. Full-term birth = 40 weeks

Swartz JJ, Hainmueller J, Lawrence J, Rodriguez MI. Expanding prenatal care to unauthorized immigrant women and the effects on infant health. *Obstet Gynecol* 2017; 130.

The authors provided this information as a supplement to their article.

©2017 American College of Obstetricians and Gynecologists.

7. Preterm birth = 34 weeks
  8. Unknown abortion = 10 weeks
  9. Early Loss unknown type = 10 weeks
  10. Trophoblastic pregnancy = 8 weeks
- g. Subtract gestational age from outcome date to group claims as relating to a single pregnancy episode if they fall within the date range. Include claims falling in a pre-specified time period after the claim as follow up or postpartum care
1. Ectopic pregnancy = 4 weeks
  2. Spontaneous abortion = 4 weeks
  3. Therapeutic abortion = 4 weeks
  4. Preterm birth = 8 weeks
  5. Stillbirth = 8 weeks
  6. Full-term birth = 8 weeks
  7. Preterm birth = 8 weeks
  8. Unknown abortion = 4 weeks
  9. Early Loss unknown type = 4 weeks
  10. Trophoblastic pregnancy = 4 weeks
- h. Initially, exclude days with pregnancy outcomes that would have overlapping time windows for the pregnancy episodes.
- i. After the first, non-overlapping classification, search among the remaining days with outcome code claims for scores of 10 and then scores of 5. Designate additional pregnancy episode outcomes if they are separated from preceding or subsequent outcomes by a minimum number of weeks based on biological feasibility.
1. Ectopic pregnancy = 4 week prior, 4 weeks following
  2. Spontaneous abortion = 4 week prior, 4 weeks following
  3. Therapeutic abortion = 4 week prior, 4 weeks following
  4. Preterm birth = 20 weeks prior, 8 weeks following
  5. Stillbirth = 20 weeks prior, 8 weeks following
  6. Full-term birth = 20 weeks prior, 8 weeks following
  7. Preterm birth = 20 weeks prior, 8 weeks following

Swartz JJ, Hainmueller J, Lawrence J, Rodriguez MI. Expanding prenatal care to unauthorized immigrant women and the effects on infant health. *Obstet Gynecol* 2017; 130.

The authors provided this information as a supplement to their article.

©2017 American College of Obstetricians and Gynecologists.

8. Unknown abortion = 4 week prior, 4 weeks following
9. Early Loss unknown type = 4 week prior, 4 weeks following
10. Trophoblastic pregnancy = 4 week prior, 4 weeks following

Overall of 586,060 days that had one or more outcome codes, 98.5% of days ended up being associated with a pregnancy episode. Of the 577,459 days associated with a pregnancy episode, about 99.3% were identified in the first non-overlapping classification.

## **Appendix 2**

### ***Greedy matching algorithm for women and infants***

The following procedure was used to match pregnancies to infants in the claims data.

1. Identify pregnancy outcomes that would result in a live birth among women in the claims data aged 12-51  $\pm$ as detailed above.
2. Identify claimants aged 0 in the claims database.
3. Use three variables to find a first set of matches: scrambled Household ID, the date of the birth based on the end of the pregnancy period, and the infant date of birth.
  - a. Date of birth must match the estimated date of the pregnancy outcome  $\pm 2$  days
4. For pregnancies that remain unmatched, search for a matching infant among the remaining cohort using the a matching date  $\pm 2$  days for the estimated date of the birth based on the end of the pregnancy and the infant date of birth, enrollment zip code of the claimants  $\pm$ mother and infant, service zip codes of the claimants  $\pm$ mother and infant, race and ethnicity  $\pm$ mother and infant.
5. In the matched data we then dropped multiple birth.
6. The final match rate was 77% overall including 83% for pregnancies under Emergency Medicaid, 82% for pregnancies under Emergency Medicaid Plus, and 76% for pregnancies under Medicaid. The match rate was fairly stable over the years with a minimum match rate of 74% and a maximum match rate of 81% and a standard deviation of the match rate across years of 0.02. This temporal stability pattern was roughly similar for all three insurance groups.

### Appendix 3.

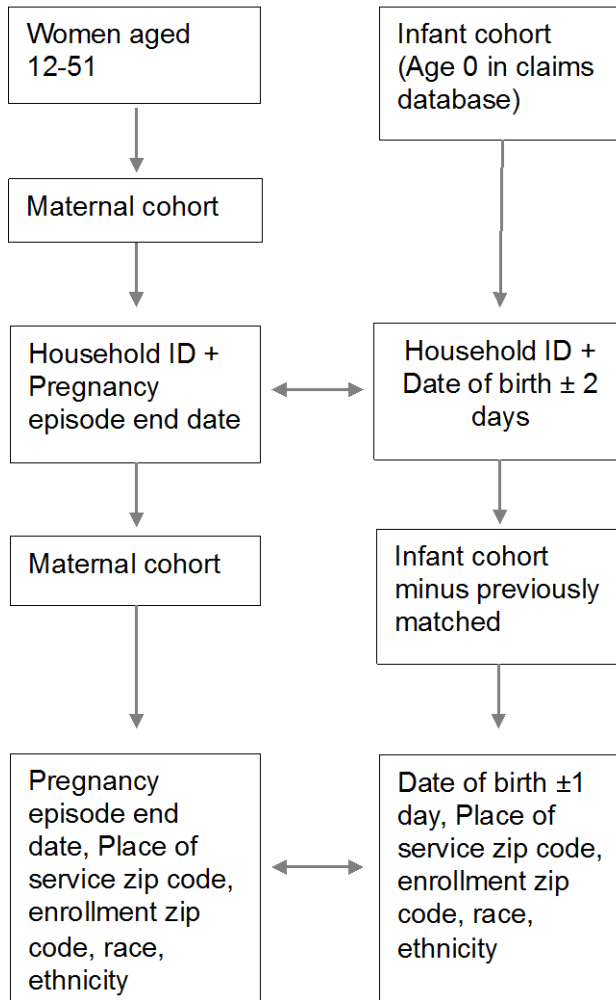

1

Swartz JJ, Hainmueller J, Lawrence J, Rodriguez MI. Expanding prenatal care to unauthorized immigrant women and the effects on infant health. *Obstet Gynecol* 2017; 130.

The authors provided this information as a supplement to their article.

©2017 American College of Obstetricians and Gynecologists.

#### Appendix 4: Start Date of Emergency Medicaid Plus by County

| County:    | Start Date: |
|------------|-------------|
| Deschutes  | 4/1/08      |
| Multnomah  | 4/1/08      |
| Jackson    | 10/1/09     |
| Benton     | 10/1/09     |
| Clackamas  | 10/1/09     |
| Hood River | 10/1/09     |
| Lane       | 1/1/11      |
| Wasco      | 7/1/11      |
| Columbia   | 7/1/11      |
| Crook      | 7/1/11      |
| Union      | 7/1/11      |
| Jefferson  | 7/1/11      |
| Morrow     | 7/1/11      |
| Douglas    | 7/1/11      |
| Umatilla   | 4/1/12      |
| Gilliam    | 10/1/13     |
| Wheeler    | 10/1/13     |
| Curry      | 10/1/13     |
| Klamath    | 10/1/13     |
| Grant      | 10/1/13     |
| Clatsop    | 10/1/13     |
| Lake       | 10/1/13     |
| Polk       | 10/1/13     |
| Sherman    | 10/1/13     |
| Marion     | 10/1/13     |
| Coos       | 10/1/13     |
| Washington | 10/1/13     |
| Tillamook  | 10/1/13     |
| Malheur    | 10/1/13     |
| Yamhill    | 10/1/13     |
| Wallowa    | 10/1/13     |
| Baker      | 10/1/13     |
| Josephine  | 10/1/13     |
| Lincoln*   | 10/1/13     |
| Linn       | 10/1/13     |
| Harney     | 10/1/13     |

**Source:** Administrative records and personal communication with the Oregon Health Authority.

\*Lincoln county initially participated in the Emergency Medicaid Plus program from October to December 2009 but then ended its participation until October 2013.

Swartz JJ, Hainmueller J, Lawrence J, Rodriguez MI. Expanding prenatal care to unauthorized immigrant women and the effects on infant health. *Obstet Gynecol* 2017; 130.

The authors provided this information as a supplement to their article.

©2017 American College of Obstetricians and Gynecologists.

## **Description of Appendixes 5-8**

### **Measures**

We examined outcomes related to utilization of health services for mothers and infants, as well as health outcomes related to mothers and infants. We used ICD-9, CPT and National Drug Codes ±NDC.

### **Appendix 5. Codes for Outcome Measures for Immigrant Women**

| Measure                        | ICD-9        | CPT                                                                                       | NDC#                                                                                           |
|--------------------------------|--------------|-------------------------------------------------------------------------------------------|------------------------------------------------------------------------------------------------|
| Number of prenatal visits*     | V22.x, V23.x |                                                                                           |                                                                                                |
| Preterm delivery <sup>+</sup>  | 644.21       |                                                                                           |                                                                                                |
| Tdap vaccine                   |              | 90715, 90658, 90654, 90667, 90661, 90630, 90662, 90688, 90656, 90673, 90686, 90471, 90472 |                                                                                                |
| Rhogam administration          |              | G8809, G8810, J2788, J2790, J2791, J2792, 90384, 90385, 90386                             | 0562780501, 0562780508, 0562780525, 0562780601, 0562780605, 0562780625, 4420630001, 4420630010 |
| Oral glucose tolerance testing |              | 82947, 82950, 82951, 82952                                                                |                                                                                                |

# National Drug Codes

\* Visits were defined as claims from distinct days of service as multiple claims were often associated with a single visit including primary, secondary and tertiary diagnosis codes associated with the claim.

<sup>+</sup> Preterm birth was identified using both maternal and infant ICD-9 codes.

Swartz JJ, Hainmueller J, Lawrence J, Rodriguez MI. Expanding prenatal care to unauthorized immigrant women and the effects on infant health. *Obstet Gynecol* 2017; 130.

The authors provided this information as a supplement to their article.

©2017 American College of Obstetricians and Gynecologists.

## Appendix 6. Codes for Outcome Measures for Infants

| Measure                       | ICD-9 codes          |
|-------------------------------|----------------------|
| Number of Well-child visits*  | V20.x                |
| Preterm delivery <sup>+</sup> | 765.x, 774.2x, 776.x |
| Low birthweight <sup>±</sup>  | 764.x and 765.x      |
|                               |                      |

\* Visits were defined as claims from distinct days of service as multiple claims were often associated with a single visit including primary, secondary and tertiary diagnosis codes associated with the claim.

<sup>+</sup> Preterm birth was identified using both maternal and infant ICD-9 codes.

<sup>±</sup> Coding sections that indicate weight listed with the fifth digit used for weight category.

Screening and vaccines were identified using a comprehensive vaccine list from the Centers for Disease Control and Prevention, a Preventive Medicine Coding Fact Sheet from the American Academy of Pediatrics, and a manual search.<sup>2,3</sup> The list included the following components:

Swartz JJ, Hainmueller J, Lawrence J, Rodriguez MI. Expanding prenatal care to unauthorized immigrant women and the effects on infant health. *Obstet Gynecol* 2017; 130.

The authors provided this information as a supplement to their article.

©2017 American College of Obstetricians and Gynecologists.

### Appendix 7. Codes for Screenings for Infants

| Screenings              | CPT                 |
|-------------------------|---------------------|
| Vision screening        | 99173, 99174        |
| Hearing screening       | 92551, 92552, 92567 |
| Developmental Screening | 96110               |
| Lead screening          | 83655               |

Swartz JJ, Hainmueller J, Lawrence J, Rodriguez MI. Expanding prenatal care to unauthorized immigrant women and the effects on infant health. *Obstet Gynecol* 2017; 130.

The authors provided this information as a supplement to their article.

©2017 American College of Obstetricians and Gynecologists.



## Appendix 8. Codes for Vaccines

| Vaccine                                                                                                               | CPT   |
|-----------------------------------------------------------------------------------------------------------------------|-------|
| Immune globulin ±IG, human, for intramuscular use                                                                     | 90281 |
| Immune globulin ±IGIV, human, for intravenous use                                                                     | 90283 |
| Botulinum antitoxin, equine, any route                                                                                | 90287 |
| Cytomegalovirus immune globulin ±CMV-IGIV, human, for intravenous use                                                 | 90291 |
| Diphtheria antitoxin, equine, any route                                                                               | 90296 |
| Hepatitis B immune globulin ±HBIG, human, for intramuscular use                                                       | 90371 |
| Rabies immune globulin ±RIG, human, for intramuscular and/or subcutaneous use                                         | 90375 |
| Rabies immune globulin, heat-treated ±RIG-HT, human, for intramuscular and/or subcutaneous use                        | 90376 |
| Respiratory syncytial virus immune globulin ±RSV-IgIM, for intramuscular use, 50 mg, each                             | 90378 |
| Respiratory syncytial virus immune globulin ±RSV-IGIV, human, for intravenous use                                     | 90379 |
| Tetanus immune globulin ±TIG, human, for intramuscular use                                                            | 90389 |
| Vaccinia immune globulin, human, for intramuscular use                                                                | 90393 |
| Varicella-zoster immune globulin, human, for intramuscular use                                                        | 90396 |
| H1N1 immunization administration ±intramuscular, intranasal, including counseling when performed                      | 90470 |
| Adenovirus vaccine, type 4, live, for oral use                                                                        | 90476 |
| Adenovirus vaccine, type 7, live, for oral use                                                                        | 90477 |
| Anthrax vaccine, for subcutaneous use                                                                                 | 90581 |
| Bacillus Calmette-Guerin vaccine ±BCG for tuberculosis, live, for percutaneous use                                    | 90585 |
| Meningococcal recombinant protein and outer membrane vesicle vaccine, serogroup B, 2 dose schedule, for intramuscular | 90620 |
| Meningococcal recombinant lipoprotein vaccine, serogroup B, 3 dose schedule, for intramuscular use                    | 90621 |

Swartz JJ, Hainmueller J, Lawrence J, Rodriguez MI. Expanding prenatal care to unauthorized immigrant women and the effects on infant health. *Obstet Gynecol* 2017; 130.

The authors provided this information as a supplement to their article.

©2017 American College of Obstetricians and Gynecologists.

|                                                                                                                                            |       |
|--------------------------------------------------------------------------------------------------------------------------------------------|-------|
| Cholera vaccine live, adult dosage, 1 dose schedule, for oral use                                                                          | 90625 |
| Influenza virus vaccine, quadrivalent ±IIV4, split virus, preservative free, for intradermal use                                           | 90630 |
| Hepatitis A vaccine, adult dosage, for intramuscular use                                                                                   | 90632 |
| Hepatitis A vaccine, pediatric/adolescent dosage-2 dose schedule, for intramuscular use                                                    | 90633 |
| Hepatitis A vaccine, pediatric/adolescent dosage-3 dose schedule, for intramuscular use                                                    | 90634 |
| Hepatitis A and hepatitis B ±HepA-HepB, adult dosage, for intramuscular use                                                                | 90636 |
| Meningococcal conjugate vaccine, serogroups C & Y and Hemophilus influenza B vaccine ±MenCY-Hib                                            | 90644 |
| Haemophilus influenza b vaccine ±Hib, HbOC conjugate ±4 dose schedule, for intramuscular use                                               | 90645 |
| Haemophilus influenza b vaccine ±Hib, PRP-D conjugate, for booster use only, intramuscular use                                             | 90646 |
| Haemophilus influenza b vaccine ±Hib, PRP-OMP conjugate ±3 dose schedule, for intramuscular use                                            | 90647 |
| Haemophilus influenza b vaccine ±Hib, PRP-T conjugate ±4 dose schedule, for intramuscular use                                              | 90648 |
| Human Papilloma virus ±HPV vaccine, types 6, 11, 16, 18 ±quadrivalent 3 dose schedule, for intramuscular use                               | 90649 |
| Human Papilloma virus ±HPV vaccine, types 16, 18, bivalent, 3 dose schedule, for intramuscular use                                         | 90650 |
| Human Papillomavirus vaccine types 6, 11, 16, 18, 31, 33, 45, 52, 58, nonavalent ±HPV                                                      | 90651 |
| Influenza virus vaccine, inactivated, subunit, adjuvanted for IM us                                                                        | 90653 |
| Influenza virus vaccine, split virus, preservative free, for intradermal use                                                               | 90654 |
| Influenza virus vaccine, trivalent, split virus, preservative free, for children 6-35 months of age, for intramuscular use                 | 90655 |
| Influenza virus vaccine, trivalent, split virus, preservative free, for use in individuals 3 years of age and above, for intramuscular use | 90656 |
| Influenza virus vaccine, trivalent, split virus, for children 6-35 months of age, for intramuscular use                                    | 90657 |

Swartz JJ, Hainmueller J, Lawrence J, Rodriguez MI. Expanding prenatal care to unauthorized immigrant women and the effects on infant health. *Obstet Gynecol* 2017; 130.

The authors provided this information as a supplement to their article.

©2017 American College of Obstetricians and Gynecologists.

|                                                                                                                                                                           |       |
|---------------------------------------------------------------------------------------------------------------------------------------------------------------------------|-------|
| Influenza virus vaccine, trivalent, split virus, for use in individuals 3 years of age and above, for intramuscular use                                                   | 90658 |
| Influenza virus vaccine, whole virus, for intramuscular or jet injection use                                                                                              | 90659 |
| Influenza virus vaccine, trivalent, live, for intranasal use                                                                                                              | 90660 |
| Influenza virus vaccine, derived from cell cultures, subunit, preservative and antibiotic free, for intramuscular use                                                     | 90661 |
| Influenza virus vaccine, split virus, preservative free, enhanced immunogenicity via increased antigen content, for intramuscular use                                     | 90662 |
| Influenza virus vaccine, pandemic formulation, H1N1                                                                                                                       | 90663 |
| Influenza virus vaccine, pandemic formulation, live, for intranasal use                                                                                                   | 90664 |
| Lyme disease vaccine, adult dosage, for intramuscular use                                                                                                                 | 90665 |
| Influenza virus vaccine, pandemic formulation, split-virus, preservative free, for intramuscular use                                                                      | 90666 |
| Influenza virus vaccine, pandemic formulation, split-virus, for intramuscular use                                                                                         | 90668 |
| Pneumococcal conjugate vaccine, polyvalent, for children under five years, for intramuscular use                                                                          | 90669 |
| Pneumococcal conjugate vaccine, 13 valent, for intramuscular use                                                                                                          | 90670 |
| Influenza virus vaccine, quadrivalent $\pm$ LAIV, live, intranasal use                                                                                                    | 90672 |
| Influenza virus vaccine, trivalent, derived from recombinant DNA $\pm$ RIV3, hemagglutinin $\pm$ HA protein only, preservative and antibiotic free, for intramuscular use | 90673 |
| Influenza virus vaccine, quadrivalent $\pm$ ccIIV4, derived from cell cultures, subunit, preservative and antibiotic free, 0.5 mL dosage, for intramuscular use           | 90674 |
| Rabies vaccine, for intramuscular use                                                                                                                                     | 90675 |
| Rabies vaccine, for intramuscular use                                                                                                                                     | 90675 |
| Rabies vaccine, for intramuscular use                                                                                                                                     | 90675 |
| Rabies vaccine, for intradermal use                                                                                                                                       | 90676 |
| Rotavirus vaccine, pentavalent, 3 dose schedule, live, for oral use                                                                                                       | 90680 |
| Rotavirus vaccine, human, attenuated, 2 dose schedule, live, for oral use                                                                                                 | 90681 |

Swartz JJ, Hainmueller J, Lawrence J, Rodriguez MI. Expanding prenatal care to unauthorized immigrant women and the effects on infant health. *Obstet Gynecol* 2017; 130.

The authors provided this information as a supplement to their article.

©2017 American College of Obstetricians and Gynecologists.

|                                                                                                                                                                                                                      |       |
|----------------------------------------------------------------------------------------------------------------------------------------------------------------------------------------------------------------------|-------|
| Influenza virus vaccine, quadrivalent, split virus, preservative free, when administered to children 6-35 months of age, for intramuscular use                                                                       | 90685 |
| Influenza virus vaccine, quadrivalent, split virus, preservative free, when administered to individuals 3 years of age and older, for intramuscular use                                                              | 90686 |
| Influenza virus vaccine, quadrivalent, split virus, when administered to children 6-35 months of age, for intramuscular use                                                                                          | 90687 |
| Influenza virus vaccine, quadrivalent, split virus, when administered to individuals 3 years of age and older, for intramuscular use                                                                                 | 90688 |
| Typhoid vaccine, live, oral                                                                                                                                                                                          | 90690 |
| Typhoid vaccine, Vi capsular polysaccharide ±ViCPs, for intramuscular use                                                                                                                                            | 90691 |
| Typhoid vaccine, heat- and phenol-inactivated ±H-P, for subcutaneous or intradermal use                                                                                                                              | 90692 |
| Typhoid vaccine, acetone-killed, dried ±AKD, for subcutaneous use ±U.S. military                                                                                                                                     | 90693 |
| Diphtheria, tetanus toxoids, acellular pertussis vaccine and poliovirus vaccine, inactivated ±DTaP-IPV, when administered to children 4 years through 6 years of age, for intramuscular use                          | 90696 |
| Diphtheria, tetanus toxoids, acellular pertussis vaccine, inactivated poliovirus vaccine, Haemophilus influenzae type b PRP-OMP conjugate vaccine, and hepatitis B vaccine ±DTaP-IPV-Hib-HepB, for intramuscular use | 90697 |
| Diphtheria, tetanus toxoids, and acellular pertussis vaccine, haemophilus influenza Type B, and poliovirus vaccine, inactivated ±DTaP - Hib - IPV, for intramuscular use                                             | 90698 |
| Diphtheria, tetanus toxoids, and acellular pertussis vaccine ±DTaP, for use in individuals younger than seven years, for intramuscular use                                                                           | 90700 |
| Diphtheria, tetanus toxoids, and acellular pertussis vaccine ±DTaP, for use in individuals younger than seven years, for intramuscular use                                                                           | 90700 |
| Diphtheria, tetanus toxoids, and whole cell pertussis vaccine ±DTP, for intramuscular use                                                                                                                            | 90701 |
| Diphtheria and tetanus toxoids ±DT adsorbed for use in individuals younger than seven years, for intramuscular use                                                                                                   | 90702 |
| Tetanus toxoid adsorbed, for intramuscular use                                                                                                                                                                       | 90703 |

Swartz JJ, Hainmueller J, Lawrence J, Rodriguez MI. Expanding prenatal care to unauthorized immigrant women and the effects on infant health. *Obstet Gynecol* 2017; 130.

The authors provided this information as a supplement to their article.

©2017 American College of Obstetricians and Gynecologists.

|                                                                                                                                                           |       |
|-----------------------------------------------------------------------------------------------------------------------------------------------------------|-------|
| Mumps virus vaccine, live, for subcutaneous use                                                                                                           | 90704 |
| Measles virus vaccine, live, for subcutaneous use                                                                                                         | 90705 |
| Rubella virus vaccine, live, for subcutaneous use                                                                                                         | 90706 |
| Measles, mumps and rubella virus vaccine<br>±MMR, live, for subcutaneous use                                                                              | 90707 |
| Measles and rubella virus vaccine, live, for<br>subcutaneous use                                                                                          | 90708 |
| Measles, mumps, rubella, and varicella vaccine<br>±MMRV, live, for subcutaneous use                                                                       | 90710 |
| Poliovirus vaccine, ±any type±s ±OPV, live, for<br>oral use                                                                                               | 90712 |
| Poliovirus vaccine, inactivated, ±IPV, for<br>subcutaneous or intramuscular use                                                                           | 90713 |
| Tetanus and Diphtheria, adsorbed                                                                                                                          | 90714 |
| Typhoid vaccine                                                                                                                                           | 90714 |
| Tetanus and diphtheria toxoids ±Td adsorbed,<br>preservative free, for use in individuals seven<br>years or older, for intramuscular use                  | 90714 |
| Tetanus, diphtheria toxoids and acellular pertussis<br>vaccine ±Tdap, for use in individuals 7 years or<br>older, for intramuscular use                   | 90715 |
| Varicella virus vaccine, live, for subcutaneous use                                                                                                       | 90716 |
| Yellow fever vaccine, live, for subcutaneous use                                                                                                          | 90717 |
| Tetanus and diphtheria toxoids ±Td adsorbed for<br>use in individuals seven years or older, for<br>intramuscular use                                      | 90718 |
| Diphtheria, tetanus toxoids, and whole cell<br>pertussis vaccine and Hemophilus influenza B<br>vaccine ±DTP-Hib, for intramuscular use                    | 90720 |
| Diphtheria, tetanus toxoids, and acellular pertussis<br>vaccine and Hemophilus influenza B vaccine<br>±DTaP-Hib, for intramuscular use                    | 90721 |
| Diphtheria, tetanus toxoids, acellular pertussis<br>vaccine, Hepatitis B, and poliovirus vaccine,<br>inactivated ±DTaP-HepB-IPV, for intramuscular<br>use | 90723 |
| Influenza virus vaccine                                                                                                                                   | 90724 |
| Cholera vaccine for injectable use                                                                                                                        | 90725 |
| Rabies vaccine                                                                                                                                            | 90726 |
| Plague vaccine, for intramuscular use                                                                                                                     | 90727 |
| BCG vaccine                                                                                                                                               | 90728 |
| Hepatitis A vaccine                                                                                                                                       | 90730 |

Swartz JJ, Hainmueller J, Lawrence J, Rodriguez MI. Expanding prenatal care to unauthorized immigrant women and the effects on infant health. *Obstet Gynecol* 2017; 130.

The authors provided this information as a supplement to their article.

©2017 American College of Obstetricians and Gynecologists.

|                                                                                                                                                                          |       |
|--------------------------------------------------------------------------------------------------------------------------------------------------------------------------|-------|
| Hepatitis B vaccine                                                                                                                                                      | 90731 |
| Pneumococcal polysaccharide vaccine, 23-valent, adult or immunosuppressed patient dosage, for use in individuals 2 years or older, for subcutaneous or intramuscular use | 90732 |
| Meningococcal polysaccharide vaccine $\pm$ any group $\pm$ s, for subcutaneous use                                                                                       | 90733 |
| Meningococcal conjugate vaccine, serogroups A, C, Y and W-135 $\pm$ tetravalent, for intramuscular use                                                                   | 90734 |
| Meningococcal conjugate vaccine, serogroups A, C, Y and W-135 $\pm$ tetravalent, for intramuscular use                                                                   | 90734 |
| Japanese encephalitis virus vaccine, for subcutaneous use                                                                                                                | 90735 |
| Zoster $\pm$ shingles vaccine, live, for subcutaneous injection                                                                                                          | 90736 |
| Hemophilus influenza B                                                                                                                                                   | 90737 |
| Japanese encephalitis virus vaccine, inactivated, for intramuscular use                                                                                                  | 90738 |
| Hepatitis B, adult dosage $\pm$ 2 dose schedule, for intramuscular use                                                                                                   | 90739 |
| Hepatitis B vaccine, dialysis or immunosuppressed patient dosage $\pm$ 3 dose schedule, for intramuscular use                                                            | 90740 |
| Immunization, passive; immune serum globulin, human $\pm$ ISG                                                                                                            | 90741 |
| Hepatitis B vaccine, adolescent $\pm$ 2 dose schedule, for intramuscular use                                                                                             | 90743 |
| Hepatitis B vaccine, pediatric/adolescent dosage $\pm$ 3 dose schedule, for intramuscular use                                                                            | 90744 |
| Hepatitis B vaccine, adolescent/high risk infant dosage, for intramuscular use                                                                                           | 90745 |
| Hepatitis B vaccine, adult dosage, for intramuscular use                                                                                                                 | 90746 |
| Hepatitis B vaccine, dialysis or immunosuppressed patient dosage $\pm$ 4 dose schedule, for intramuscular use                                                            | 90747 |
| Hepatitis B and Hemophilus influenza b vaccine $\pm$ HepB-Hib, for intramuscular use                                                                                     | 90748 |

Modified from Centers for Disease Control and Prevention. CPT codes mapped to CVX codes. Available at: <https://www2a.cdc.gov/vaccines/iis/iisstandards/vaccines.asp?rpt=cpt>. Retrieved March 1, 2017.

Swartz JJ, Hainmueller J, Lawrence J, Rodriguez MI. Expanding prenatal care to unauthorized immigrant women and the effects on infant health. *Obstet Gynecol* 2017; 130.

The authors provided this information as a supplement to their article.

©2017 American College of Obstetricians and Gynecologists.

## Appendix 9. Descriptive Statistics for Covariates by Insurance Group

| Insurance:                            | Emergency               |                              |                    |
|---------------------------------------|-------------------------|------------------------------|--------------------|
|                                       | Emergency Medicaid (EM) | Medicaid Plus Prenatal (EMP) | Medicaid           |
| Year of pregnancy                     | 2007.09<br>( 2.87)      | 2012.07<br>( 2.18)           | 2009.35<br>( 3.67) |
| Age at delivery (years, 12-50)        | 26.97<br>( 5.80)        | 28.75<br>( 5.94)             | 25.35<br>( 5.57)   |
| Gravidity (count)                     | 1.40<br>( 0.68)         | 1.82<br>( 0.95)              | 1.60<br>( 0.98)    |
| Ethnicity: Hispanic (0/1)             | 0.80<br>( 0.40)         | 0.77<br>( 0.42)              | 0.13<br>( 0.33)    |
| Ethnicity: Not Hispanic (0/1)         | 0.08<br>( 0.27)         | 0.23<br>( 0.42)              | 0.80<br>( 0.40)    |
| Ethnicity: Unknown (0/1)              | 0.12<br>( 0.32)         | 0.00<br>( 0.03)              | 0.07<br>( 0.26)    |
| Race: White (0/1)                     | 0.15<br>( 0.36)         | 0.23<br>( 0.42)              | 0.74<br>( 0.44)    |
| Race: Asian or Pacific islander (0/1) | 0.03<br>( 0.16)         | 0.06<br>( 0.23)              | 0.02<br>( 0.14)    |
| Race: Black (0/1)                     | 0.00<br>( 0.07)         | 0.01<br>( 0.12)              | 0.04<br>( 0.19)    |
| Race: Hispanic (0/1)                  | 0.06<br>( 0.23)         | 0.00<br>( 0.00)              | 0.00<br>( 0.06)    |
| Race: American Indian (0/1)           | 0.00<br>( 0.04)         | 0.00<br>( 0.04)              | 0.02<br>( 0.15)    |
| Race: Other (0/1)                     | 0.76<br>( 0.43)         | 0.69<br>( 0.46)              | 0.17<br>( 0.38)    |

Swartz JJ, Hainmueller J, Lawrence J, Rodriguez MI. Expanding prenatal care to unauthorized immigrant women and the effects on infant health. *Obstet Gynecol* 2017; 130.

The authors provided this information as a supplement to their article.

©2017 American College of Obstetricians and Gynecologists.

EM- Emergency Medicaid. EMP- Emergency Medicaid Plus Prenatal. Gravidity is defined as the number of pregnancies identified between 2003-2015. Columns 2-4 show means with standard deviations in parentheses. N = 35182 for EM- N = 12510 for EMP- N= 166054 for Medicaid

Swartz JJ, Hainmueller J, Lawrence J, Rodriguez MI. Expanding prenatal care to unauthorized immigrant women and the effects on infant health. *Obstet Gynecol* 2017; 130.

The authors provided this information as a supplement to their article.

©2017 American College of Obstetricians and Gynecologists.



### Appendix 10. Effect of Emergency Medicaid Plus Prenatal on Mortality of Infants

| Outcome:                             | DID Model<br>Effect 95 % CI | Triple DID Model<br>Effect 95 % CI |
|--------------------------------------|-----------------------------|------------------------------------|
| Death in first 365 days (per 1,000)  | -1.01 [ -1.42; -0.60]       | -1.40 [ -1.99; -0.82]              |
| Death in first 730 days (per 1,000)  | -1.19 [ -1.66; -0.73]       | -1.43 [ -2.10; -0.77]              |
| Death in first 1095 days (per 1,000) | -1.06 [ -1.63; -0.48]       | -1.32 [ -1.90; -0.73]              |

Effect estimates from difference-in-differences model  $\pm$ DID and triple differences model  $\pm$ Triple DID model with robust 95% confidence intervals  $\pm$ clustered by county in parentheses. Low birth weight- 2499 g or less- very low birth weight- 1500 g and less- extremely low birth weight- 1000 g or less. Emergency room visits include urgent care. All models include county fixed effects, month fixed effects, county specific time-trends, and covariates  $\pm$ age polynomial, race fixed effects, ethnicity fixed effects, and no. of pregnancy fixed effects. N = 47692 for DID models and N=213746 for Triple DID models.

**Appendix 11. Check for Compositional Shifts: Effect of Emergency Medicaid Plus Prenatal on Covariates**

| Outcome:                              | DID Model<br>Effect 95 % CI | Triple DID Model<br>Effect 95 % CI |
|---------------------------------------|-----------------------------|------------------------------------|
| Age at delivery (years, 12-50)        | -0.06 [ -0.30; 0.17]        | 0.41 [ 0.25; 0.58]                 |
| Gravidity (count)                     | 0.00 [ -0.04; 0.04]         | 0.03 [ -0.04; 0.10]                |
| Ethnicity: Hispanic (0/1)             | -0.02 [ -0.03; 0.00]        | -0.02 [ -0.05; 0.01]               |
| Ethnicity: Not Hispanic (0/1)         | 0.01 [ -0.00; 0.03]         | 0.00 [ -0.02; 0.03]                |
| Ethnicity: Unknown (0/1)              | 0.00 [ -0.00; 0.01]         | 0.01 [ -0.00; 0.03]                |
| Race: White (0/1)                     | 0.02 [ 0.00; 0.03]          | 0.09 [ 0.03; 0.15]                 |
| Race: Asian or Pacific islander (0/1) | -0.00 [ -0.01; 0.00]        | 0.02 [ 0.01; 0.02]                 |
| Race: Black (0/1)                     | -0.00 [ -0.00; 0.00]        | -0.03 [ -0.05; -0.00]              |
| Race: Hispanic (0/1)                  | 0.00 [ -0.00; 0.01]         | -0.04 [ -0.06; -0.03]              |
| Race: American Indian (0/1)           | 0.00 [ -0.00; 0.00]         | 0.00 [ -0.00; 0.01]                |
| Race: Other (0/1)                     | -0.02 [ -0.03; -0.00]       | -0.03 [ -0.07; -0.00]              |

Effect estimates from difference-in-differences model  $\pm$ DID and triple differences model  $\pm$ Triple DID model with robust 95% confidence intervals  $\pm$ clustered by county in parentheses. All models include county fixed effects, month fixed effects, and county specific time- trends. Gravidity is defined as the number of pregnancies identified between 2003-2015. N = 47692 for DID models and N=213746 for Triple DID models.

Swartz JJ, Hainmueller J, Lawrence J, Rodriguez MI. Expanding prenatal care to unauthorized immigrant women and the effects on infant health. *Obstet Gynecol* 2017; 130.

The authors provided this information as a supplement to their article.

©2017 American College of Obstetricians and Gynecologists.

**Appendix 12. Fisher Exact Test for Effect of EMP on Infant Mortality ±365 Days**

| Period:              | Pre   |         | Post  |         | Total |         |
|----------------------|-------|---------|-------|---------|-------|---------|
| Alive at 365 days    | 34522 | 99.89%  | 13125 | 99.96%  | 47647 | 99.91%  |
| Dead at 365 days     | 37    | 0.11%   | 5     | 0.04%   | 42    | 0.09%   |
| Total                | 34559 | 100.00% | 13130 | 100.00% | 47689 | 100.00% |
| Fisher's exact pval: | 0.024 |         |       |         |       |         |

Swartz JJ, Hainmueller J, Lawrence J, Rodriguez MI. Expanding prenatal care to unauthorized immigrant women and the effects on infant health. *Obstet Gynecol* 2017; 130.

The authors provided this information as a supplement to their article.

©2017 American College of Obstetricians and Gynecologists.

**Appendix 13. Fisher Exact Test for Effect of EMP on Infant Mortality  $\pm$ 730 Days**

| Period:              | Pre   |         | Post  |         | Total |         |
|----------------------|-------|---------|-------|---------|-------|---------|
| Alive at 730 days    | 34519 | 99.88%  | 13124 | 99.95%  | 47643 | 99.90%  |
| Dead at 730 days     | 40    | 0.12%   | 6     | 0.05%   | 46    | 0.10%   |
| Total                | 34559 | 100.00% | 13130 | 100.00% | 47689 | 100.00% |
| Fisher's exact pval: | 0.031 |         |       |         |       |         |

Swartz JJ, Hainmueller J, Lawrence J, Rodriguez MI. Expanding prenatal care to unauthorized immigrant women and the effects on infant health. *Obstet Gynecol* 2017; 130.

The authors provided this information as a supplement to their article.

©2017 American College of Obstetricians and Gynecologists.

**Appendix 14. Fisher Exact Test for Effect of EMP on Infant Mortality ±1095 Days**

| Period:              | Pre   |         | Post  |         | Total |         |
|----------------------|-------|---------|-------|---------|-------|---------|
| Alive at 1095 days   | 34517 | 99.88%  | 13122 | 99.94%  | 47639 | 99.90%  |
| Dead at 1095 days    | 42    | 0.12%   | 8     | 0.06%   | 50    | 0.10%   |
| Total                | 34559 | 100.00% | 13130 | 100.00% | 47689 | 100.00% |
| Fisher's exact pval: | 0.080 |         |       |         |       |         |

Swartz JJ, Hainmueller J, Lawrence J, Rodriguez MI. Expanding prenatal care to unauthorized immigrant women and the effects on infant health. *Obstet Gynecol* 2017; 130.

The authors provided this information as a supplement to their article.

©2017 American College of Obstetricians and Gynecologists.

**Appendix 15. Fisher Exact Test for Infant Mortality Pre vs Post EMP on Medicaid Sample ±365**

**Days**

| Period:              | Pre    |         | Post  |         | Total  |         |
|----------------------|--------|---------|-------|---------|--------|---------|
| Alive at 365 days    | 102365 | 99.89%  | 63467 | 99.83%  | 165832 | 99.87%  |
| Dead at 365 days     | 109    | 0.11%   | 110   | 0.17%   | 219    | 0.13%   |
| Total                | 102474 | 100.00% | 63577 | 100.00% | 166051 | 100.00% |
| Fisher's exact pval: | 0.000  |         |       |         |        |         |

Swartz JJ, Hainmueller J, Lawrence J, Rodriguez MI. Expanding prenatal care to unauthorized immigrant women and the effects on infant health. *Obstet Gynecol* 2017; 130.

The authors provided this information as a supplement to their article.

©2017 American College of Obstetricians and Gynecologists.

**Appendix 16. Fisher Exact Test for Infant Mortality Pre vs Post EMP on Medicaid Sample ±730**

**Days**

| Period:              | Pre    |         | Post  |         | Total  |         |
|----------------------|--------|---------|-------|---------|--------|---------|
| Alive at 730 days    | 102354 | 99.88%  | 63459 | 99.81%  | 165813 | 99.86%  |
| Dead at 730 days     | 120    | 0.12%   | 118   | 0.19%   | 238    | 0.14%   |
| Total                | 102474 | 100.00% | 63577 | 100.00% | 166051 | 100.00% |
| Fisher's exact pval: | 0.000  |         |       |         |        |         |

Swartz JJ, Hainmueller J, Lawrence J, Rodriguez MI. Expanding prenatal care to unauthorized immigrant women and the effects on infant health. *Obstet Gynecol* 2017; 130.

The authors provided this information as a supplement to their article.

©2017 American College of Obstetricians and Gynecologists.

**Appendix 17. Fisher Exact Test for Infant Mortality Pre vs Post EMP on Medicaid Sample ±1095 Days**

| Period:              | Pre    |         | Post  |         | Total  |         |
|----------------------|--------|---------|-------|---------|--------|---------|
| Alive at 1095 days   | 102343 | 99.87%  | 63457 | 99.81%  | 165800 | 99.85%  |
| Dead at 1095 days    | 131    | 0.13%   | 120   | 0.19%   | 251    | 0.15%   |
| Total                | 102474 | 100.00% | 63577 | 100.00% | 166051 | 100.00% |
| Fisher's exact pval: | 0.002  |         |       |         |        |         |

Swartz JJ, Hainmueller J, Lawrence J, Rodriguez MI. Expanding prenatal care to unauthorized immigrant women and the effects on infant health. *Obstet Gynecol* 2017; 130.

The authors provided this information as a supplement to their article.

©2017 American College of Obstetricians and Gynecologists.



## References

1. Hornbrook, M. C. *et al.* Development of an Algorithm to Identify Pregnancy Episodes in an Integrated Health Care Delivery System. *Health Serv. Res.* **42**, 908–927 ±2007.
2. Bright Future and Preventive Medicine Coding Fact Sheet. Available at: <https://www.aap.org/en-us/professional-resources/practice-transformation/getting-paid/Coding-at-the-AAP/Pages/Bright-Futures-and-Preventive-Medicine-Coding-Fact-Sheet.aspx>. ±Accessed: 1st March 2017

Swartz JJ, Hainmueller J, Lawrence J, Rodriguez MI. Expanding prenatal care to unauthorized immigrant women and the effects on infant health. *Obstet Gynecol* 2017; 130.

The authors provided this information as a supplement to their article.

©2017 American College of Obstetricians and Gynecologists.
